# Supplementary material
Source: PubMed Central journal article supplement (PMC5543917)
Supplement: jciinsight-2-93313-s001.pdf [file jciinsight-2-93313-s001.pdf]

## LEGENDS TO SUPPLEMENTARY INFORMATION

### Supplementary Figure 1. IHC and proliferation analysis of *pten*-deficient mammary tumors

- A. Induced expression of estrogen receptor  $\alpha$  (ER $\alpha$ ) in AME vs PDA tumors. Student's t test,  $p=0.0005$ ,  $n\geq 3$ .
- B. Induced expression of Ki67 in PDAs vs AMEs. Student's t test,  $p=0.0031$ ,  $n\geq 3$ .
- C. Enlarged immunohistochemistry images of AMEs and PDAs shown in Figure 1I.  $N=6$ .
- D. In vitro growth curves of independent AME tumor cell lines incubated with indicated concentrations of  $\beta$ -estradiol. Student's t test,  $*p<0.05$ ,  $**p<0.01$ ;  $***p<0.001$ ,  $n=2$ .

### Supplementary Figure 2. Proliferation and apoptosis analyses of AME and PDA cells following orthotopic transplantation into NOD/SCID mice

Shown are representative IHC images of phospho-H3, Ki67 and activated caspase 3 of mammary glands injected with AME or PDA cells at indicated time points.  $n\geq 3$ .

### Supplementary Figure 3. GSEA reveals distinct pathways in PDAs versus AMEs

Complete GSEA of AMEs (blue) versus PDAs (red) using canonical pathways (c2.all, v4.0, Broad Institute) visualized using Cytoscape Enrichment Map. Green lines connect overlapping pathways. Size of the circles corresponds with levels of enrichment (normalized enrichment score) whereas thickness of lines corresponds with degree of overlap.  $p<0.001$ ,  $FDR<0.001$ . PDA  $n=8$ , AME  $n=13$ .

### Supplementary Figure 4. g:Profiler analysis of AMEs versus PDAs. $p<0.05$ . PDA $n=8$ , AME $n=13$ .

**Supplementary Figure 5.** aCGH analysis showing distinct genetic alterations in PDAs versus AMEs

Shown is a list of genes with significant copy number changes in PDAs versus AMEs including chromosomal location and frequency of alterations. PDA n=5, AME n=5.

**Supplementary Figure 6.** Schematic representation of *Cul9* (a) and *Cbl* (b), and relative location (asterisks) of mutations identified in PDAs. PDA n=7, AME n=3.

**Supplementary Figure 7.** Kaplan-Meier survival analysis for patients with miR-145-low/PTEN-low expression showing a trend toward significantly worse DFS compared to patients with miR-145-high/PTEN-low expression.

**Supplementary Figure 8.** miR-143/145 knockdown cooperates with *pten* loss by activating the Ras pathway

- A. In vitro growth curves of independent AME tumor cell lines transduced with miR-143/145 decoy. n $\geq$ 5.
- B. Epithelial marker analysis of AME and PDA tumors for ER $\alpha$ , K18 and K14. n $\geq$ 3.
- C. Representative Western Blot analysis of PTEN knockdown by lentiviral shRNA. n $\geq$ 3.
- D. In vitro growth curves of HC11 cells transduced with miR-143/145 decoy, *pten* shRNA or both. n $\geq$ 3.
- E. Western blot quantification showing elevated phospho-Erk levels in HC11 cells treated with both miR-143/145 decoy and *pten* shRNA compared to cells transduced with only miR-143/145 decoy, or only *pten* shRNA. n $\geq$ 8.

F. Quantitative RT-PCR analysis of indicated predicted miR-143/145 targets following miR-143/145 overexpression. n=3.

**Supplementary Figure 9.** Distinct levels of activation of 18 signaling pathways in AMEs vs PDAs

\* denotes significant differences. Red – induction in PDAs; green – induction in AMEs. PDA n=8, AME n=13.

**Figure S1**

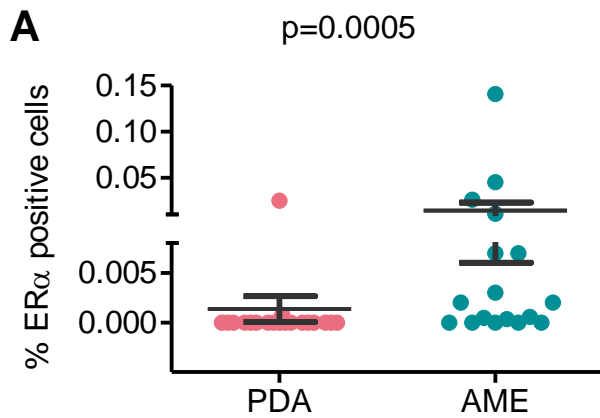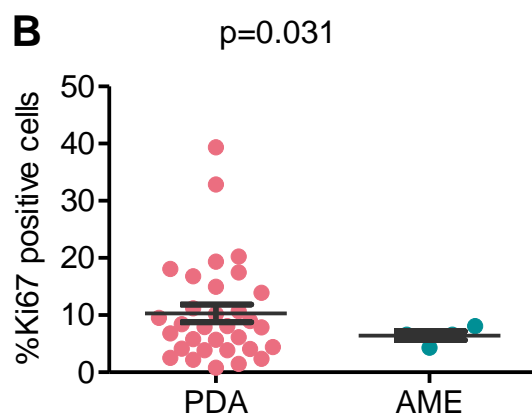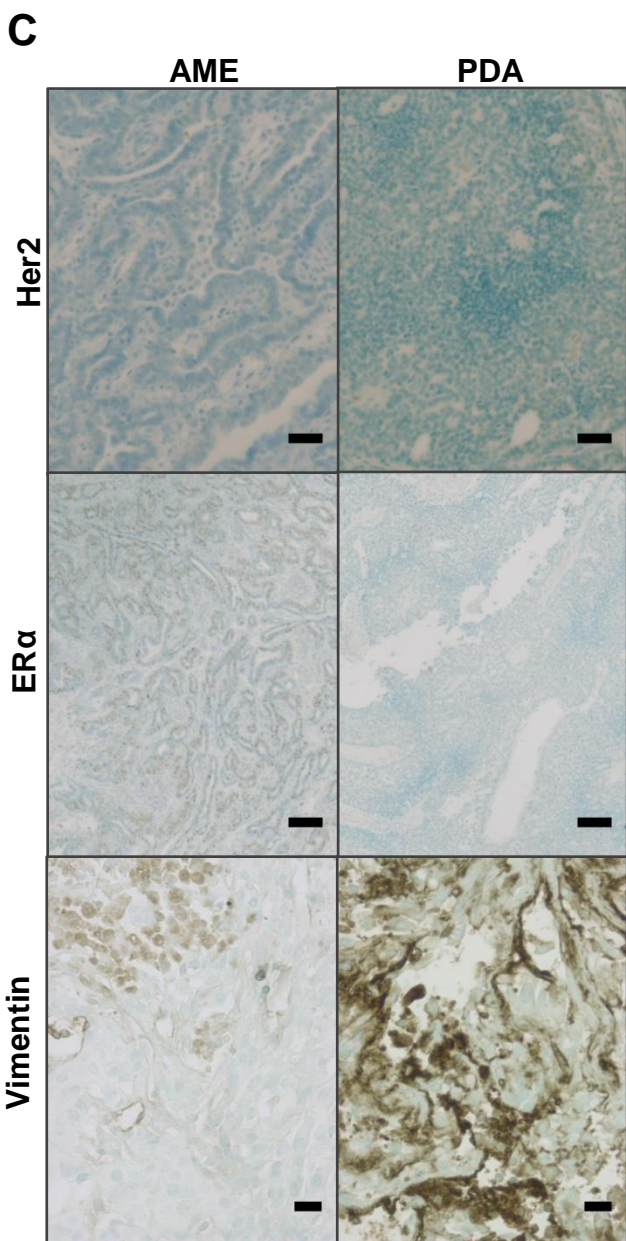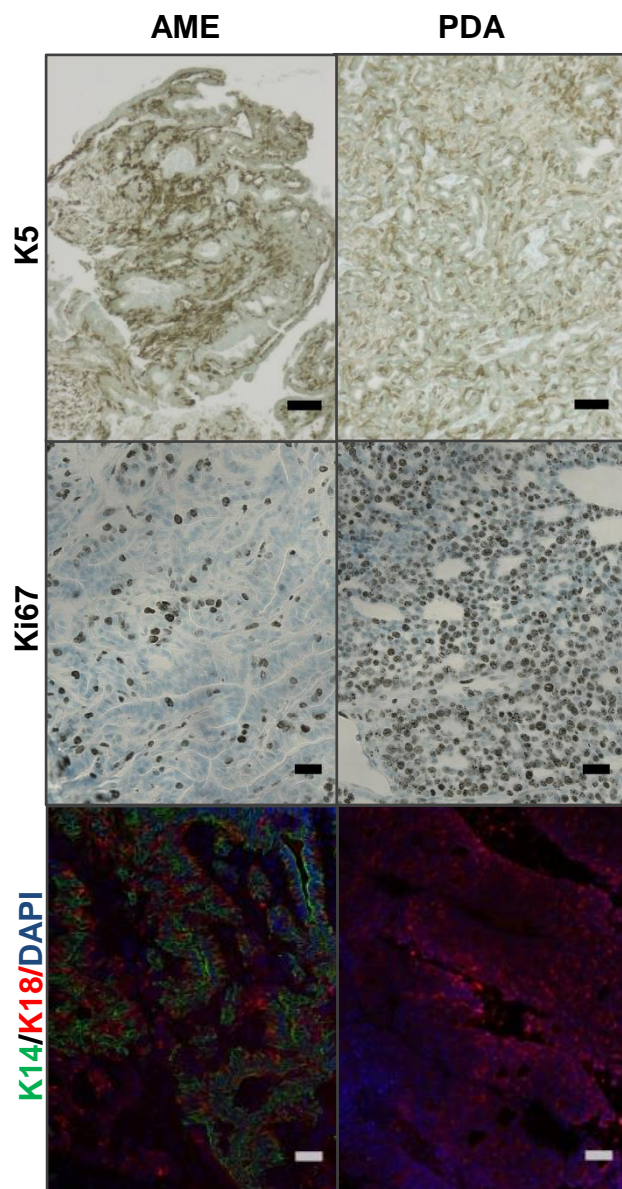

**D**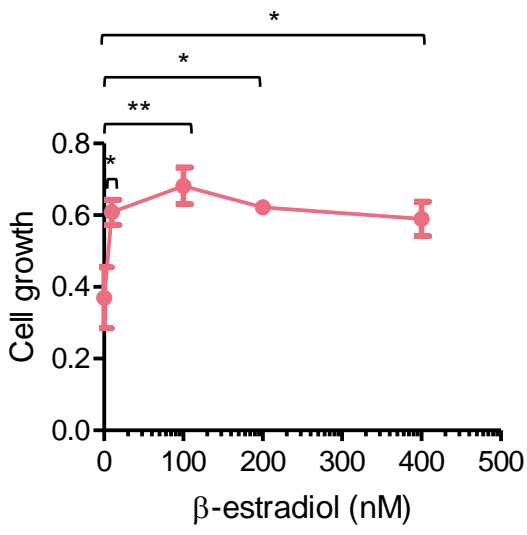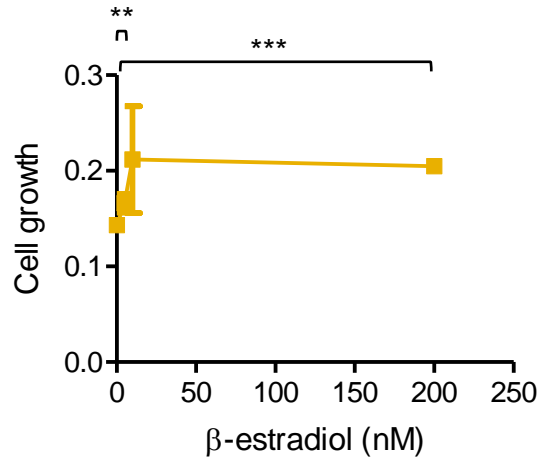

**Figure S2**

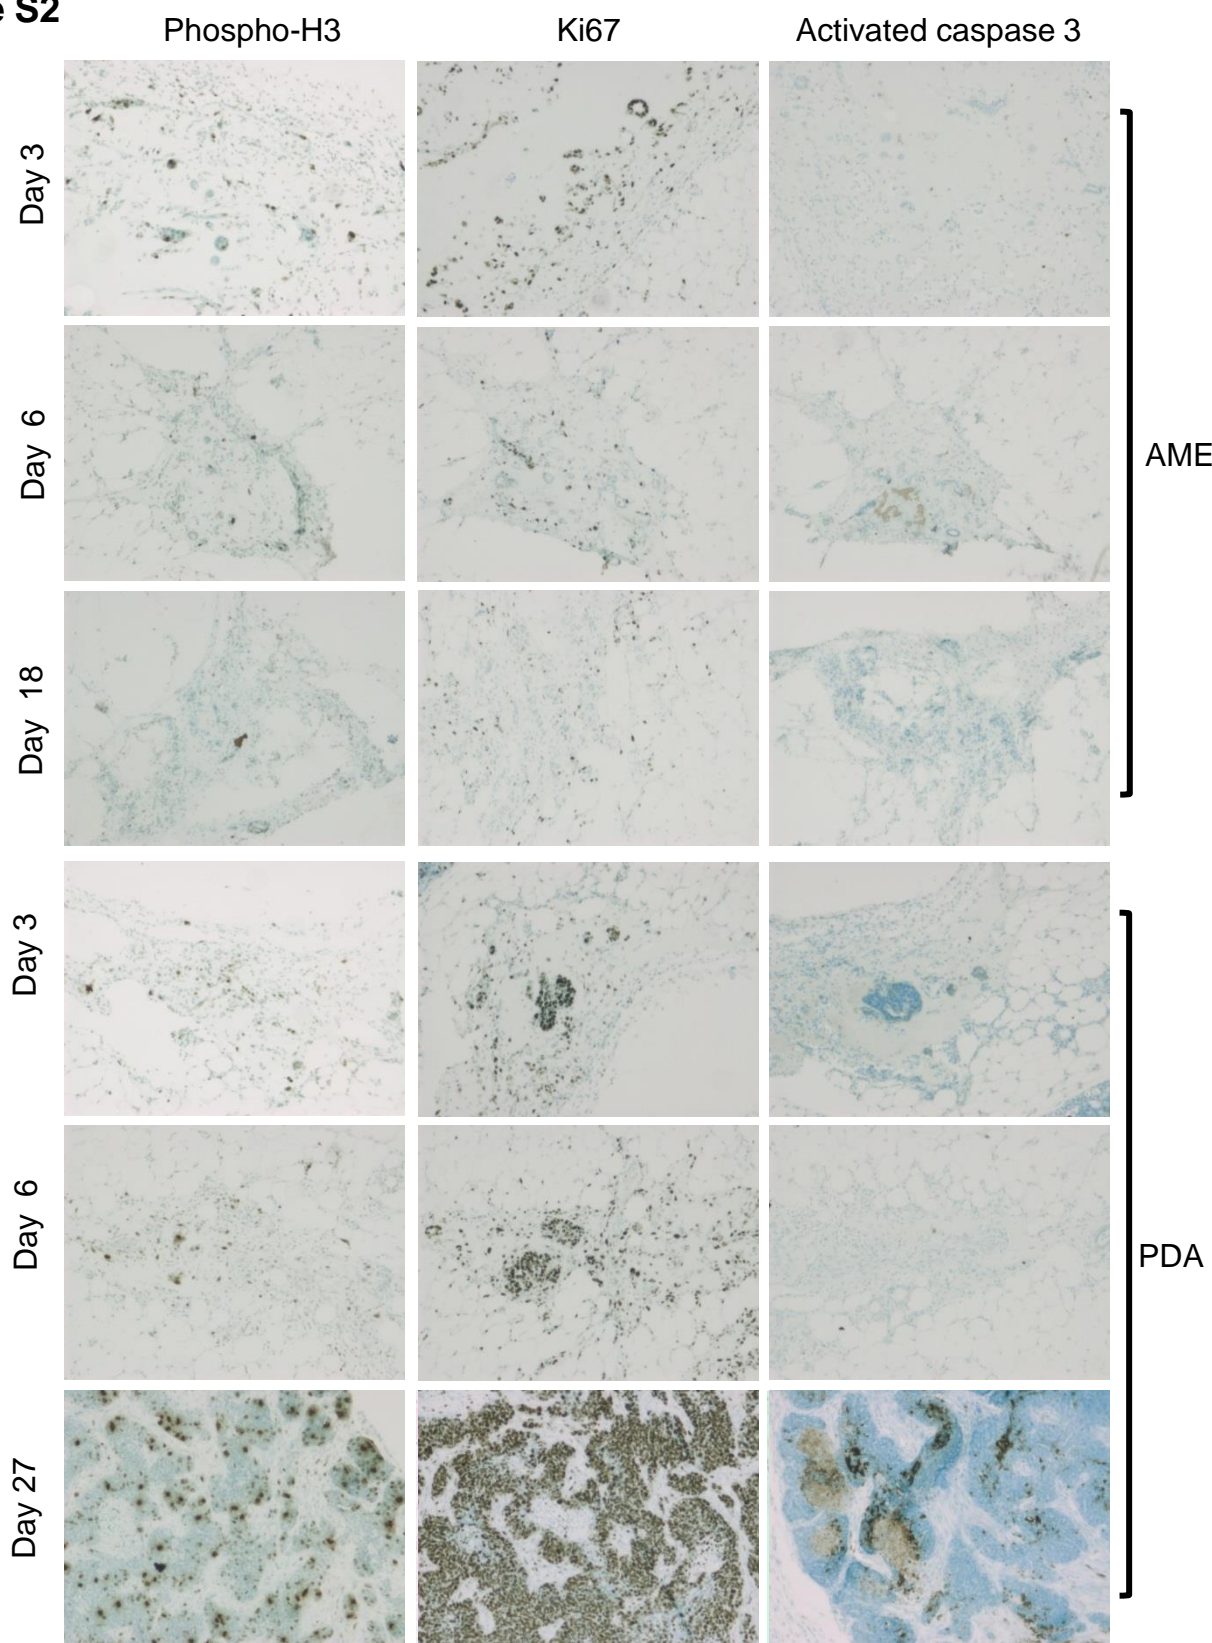

**Figure S3**

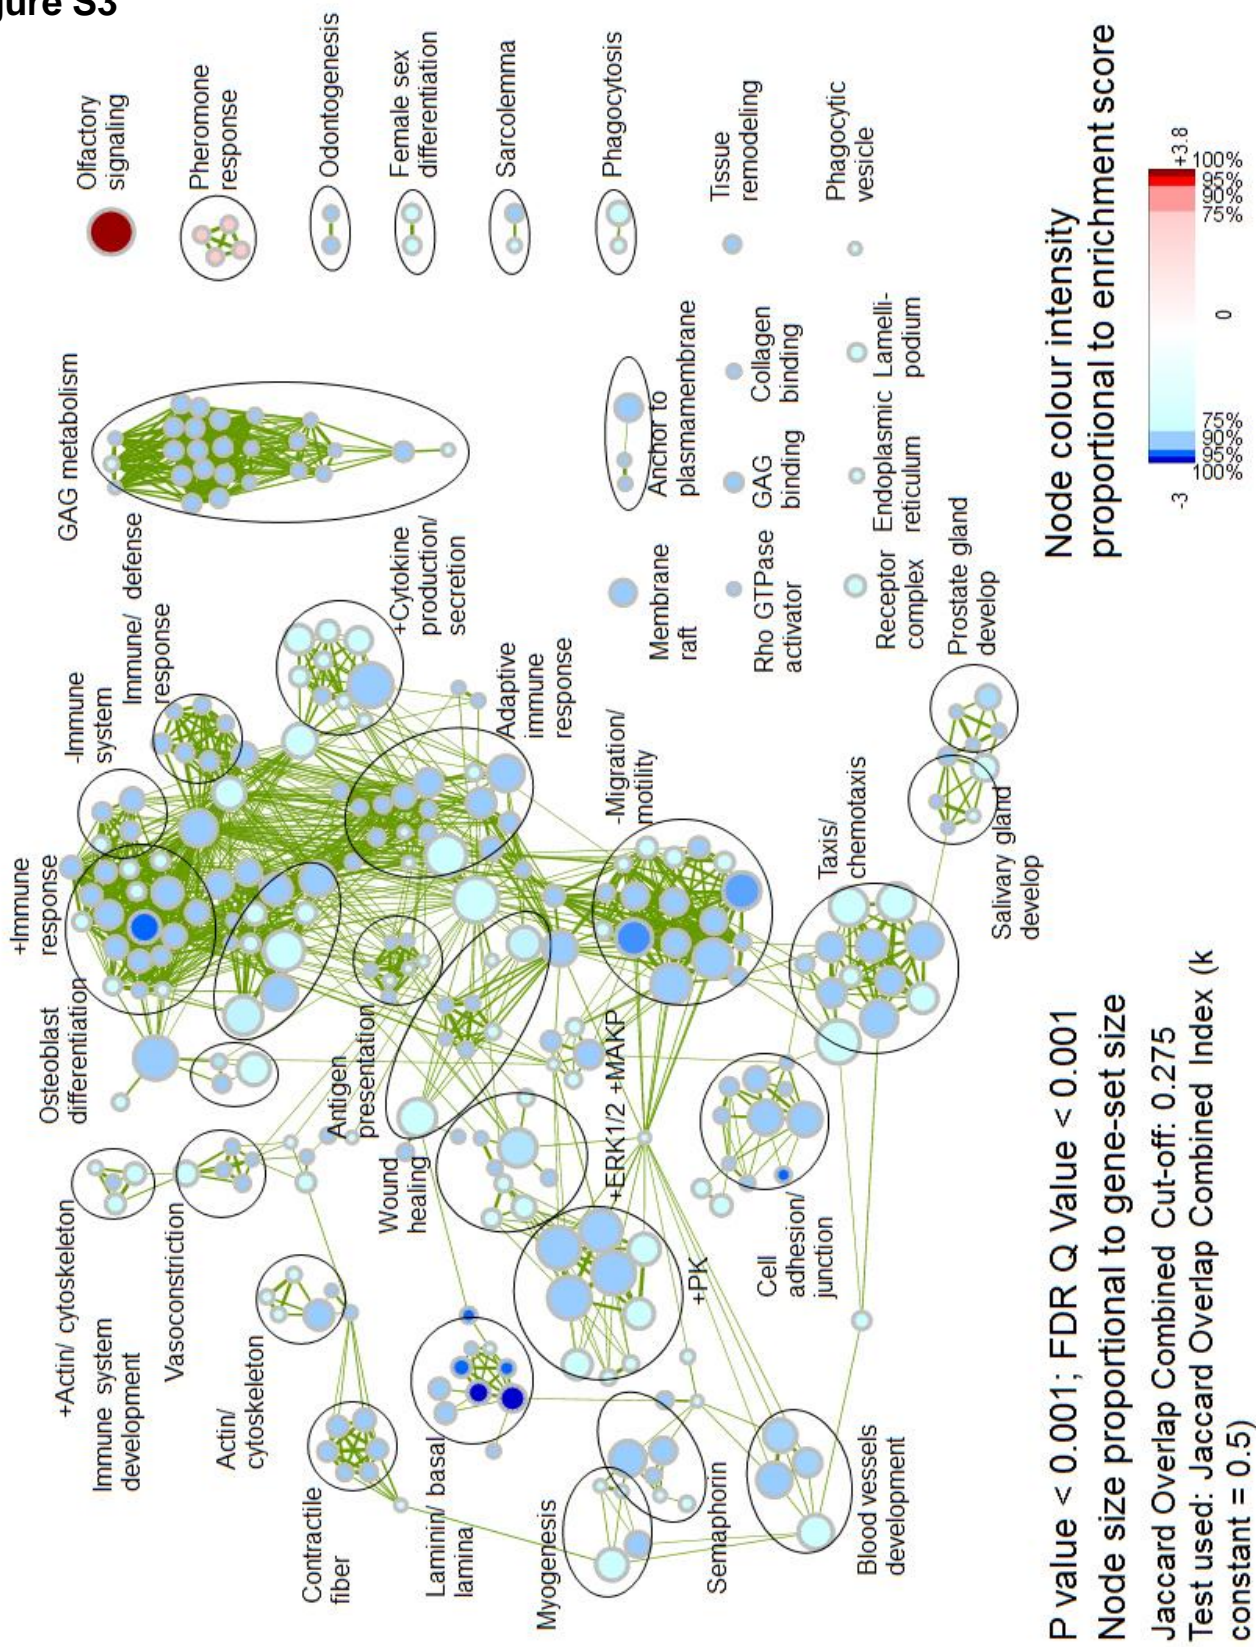

Figure S4

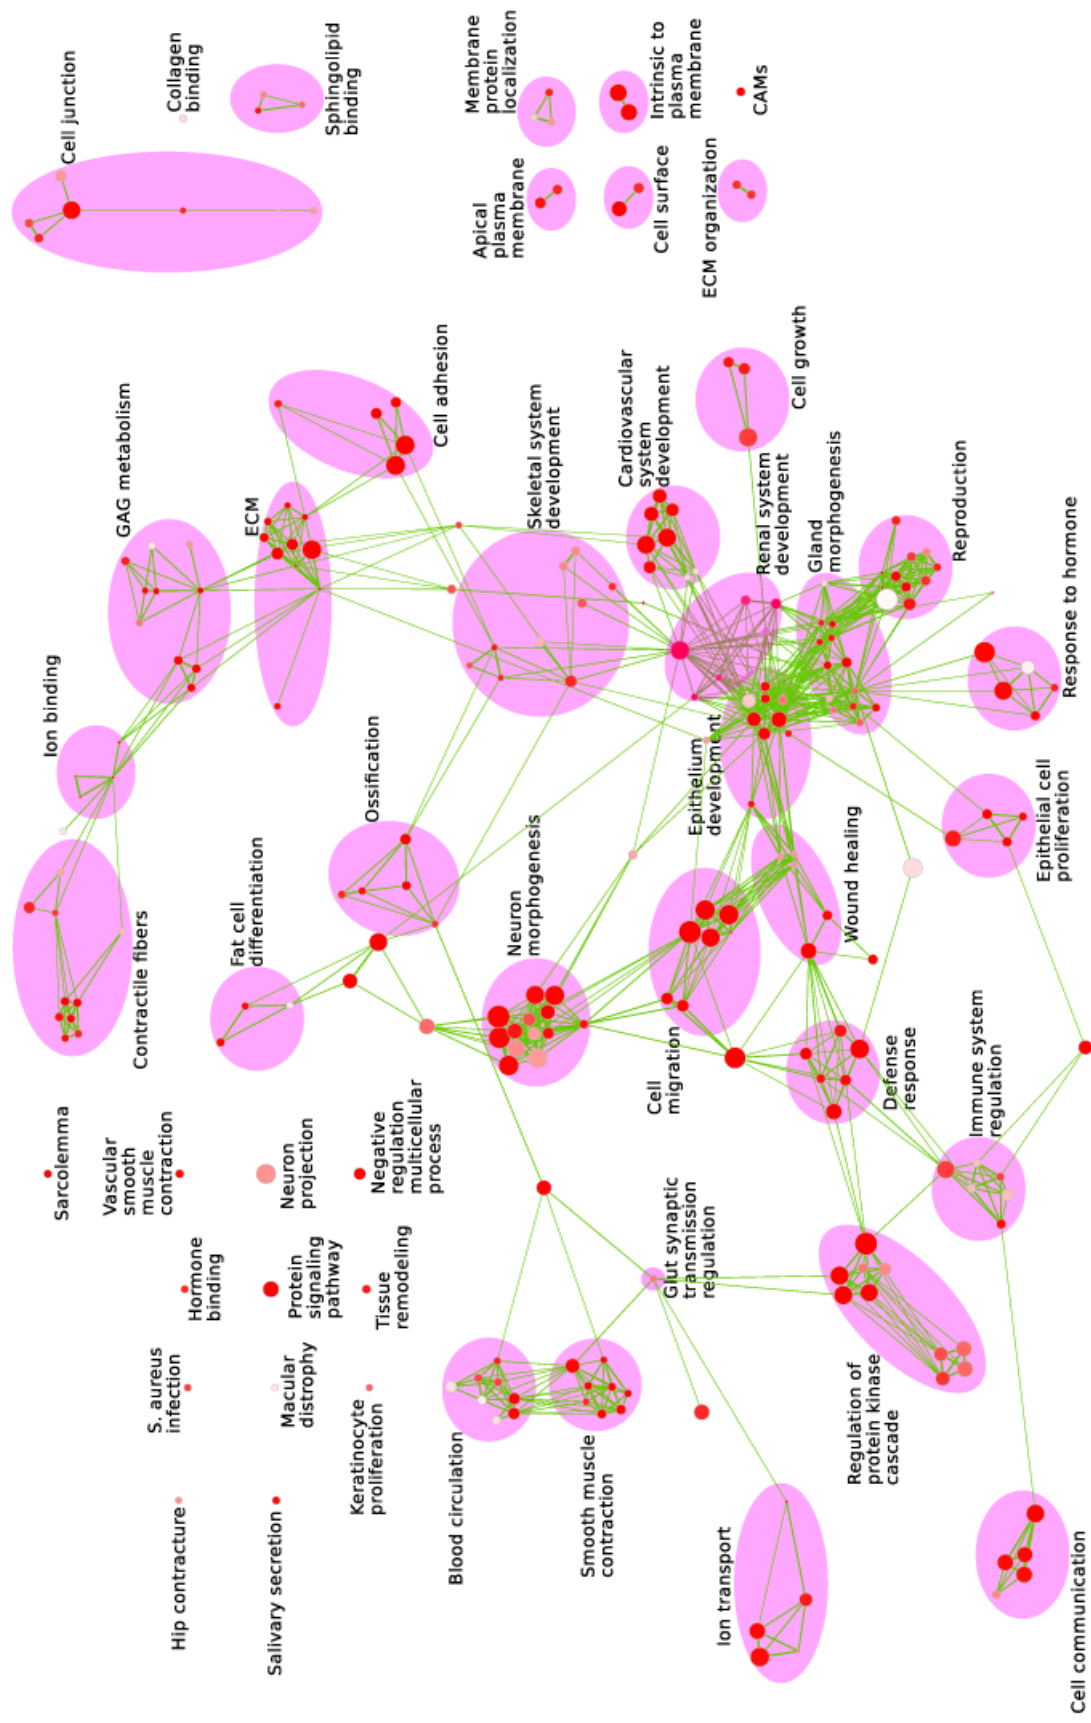

P value < 0.05



**Figure S5**

| Region                        | Event   | Freq. in PDA (%) | Freq. in AME (%) | Gene Symbols                                     |
|-------------------------------|---------|------------------|------------------|--------------------------------------------------|
| chr4:140,989,635-140,992,922  | CN Loss | 80               | 0                | Gm694                                            |
| chr6:125,678,520-125,697,798  | CN Gain | 80               | 0                | Ano2                                             |
| chr6:130,334,179-130,413,964  | CN Gain | 80               | 0                | Klra1                                            |
| chr6:137,128,694-137,132,525  | CN Gain | 80               | 0                |                                                  |
| chr6:137,792,844-137,807,440  | CN Gain | 80               | 0                |                                                  |
| chr12:79,949,645-79,962,242   | CN Gain | 0                | 80               | Atp6v1d                                          |
| chr12:114,659,196-114,668,491 | CN Loss | 0                | 80               | Igh-A (1g2), Gm16844, Igh, Ighg, V00821, abParts |
| chr12:114,668,491-114,676,477 | CN Loss | 0                | 100              | abParts                                          |
| chr12:114,715,396-114,722,266 | CN Gain | 0                | 80               | abParts                                          |
| chr12:117,668,003-117,679,572 | CN Gain | 20               | 100              | Ncapg2                                           |
| chr13:36,129,995-36,140,576   | CN Loss | 80               | 0                | Lym4                                             |
| chr14:51,574,375-51,586,687   | CN Gain | 80               | 0                | Pnp2                                             |
| chr14:52,494,308-52,502,775   | CN Gain | 80               | 0                |                                                  |
| chr14:52,575,120-52,593,014   | CN Gain | 80               | 0                |                                                  |
| chr19:17,165,722-17,173,735   | CN Loss | 80               | 0                | Prune2                                           |

Figure S6

A

Cul9

E2467  
E2467  
E2467  
E2467

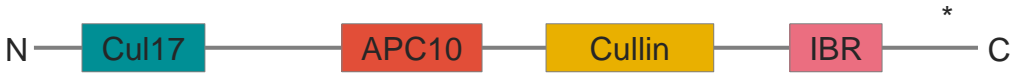

B

CBL

G848D S873T A895T  
G848D S873T A895T  
S873T

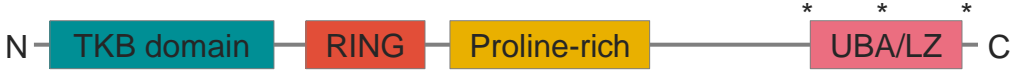

Figure S7

A

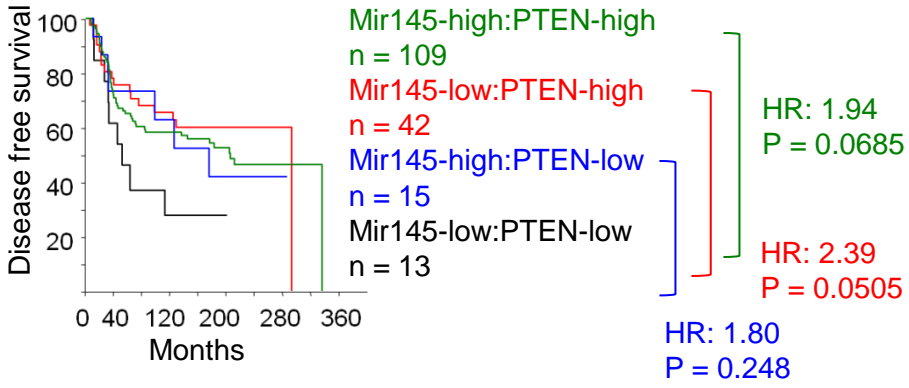

**Figure S8**

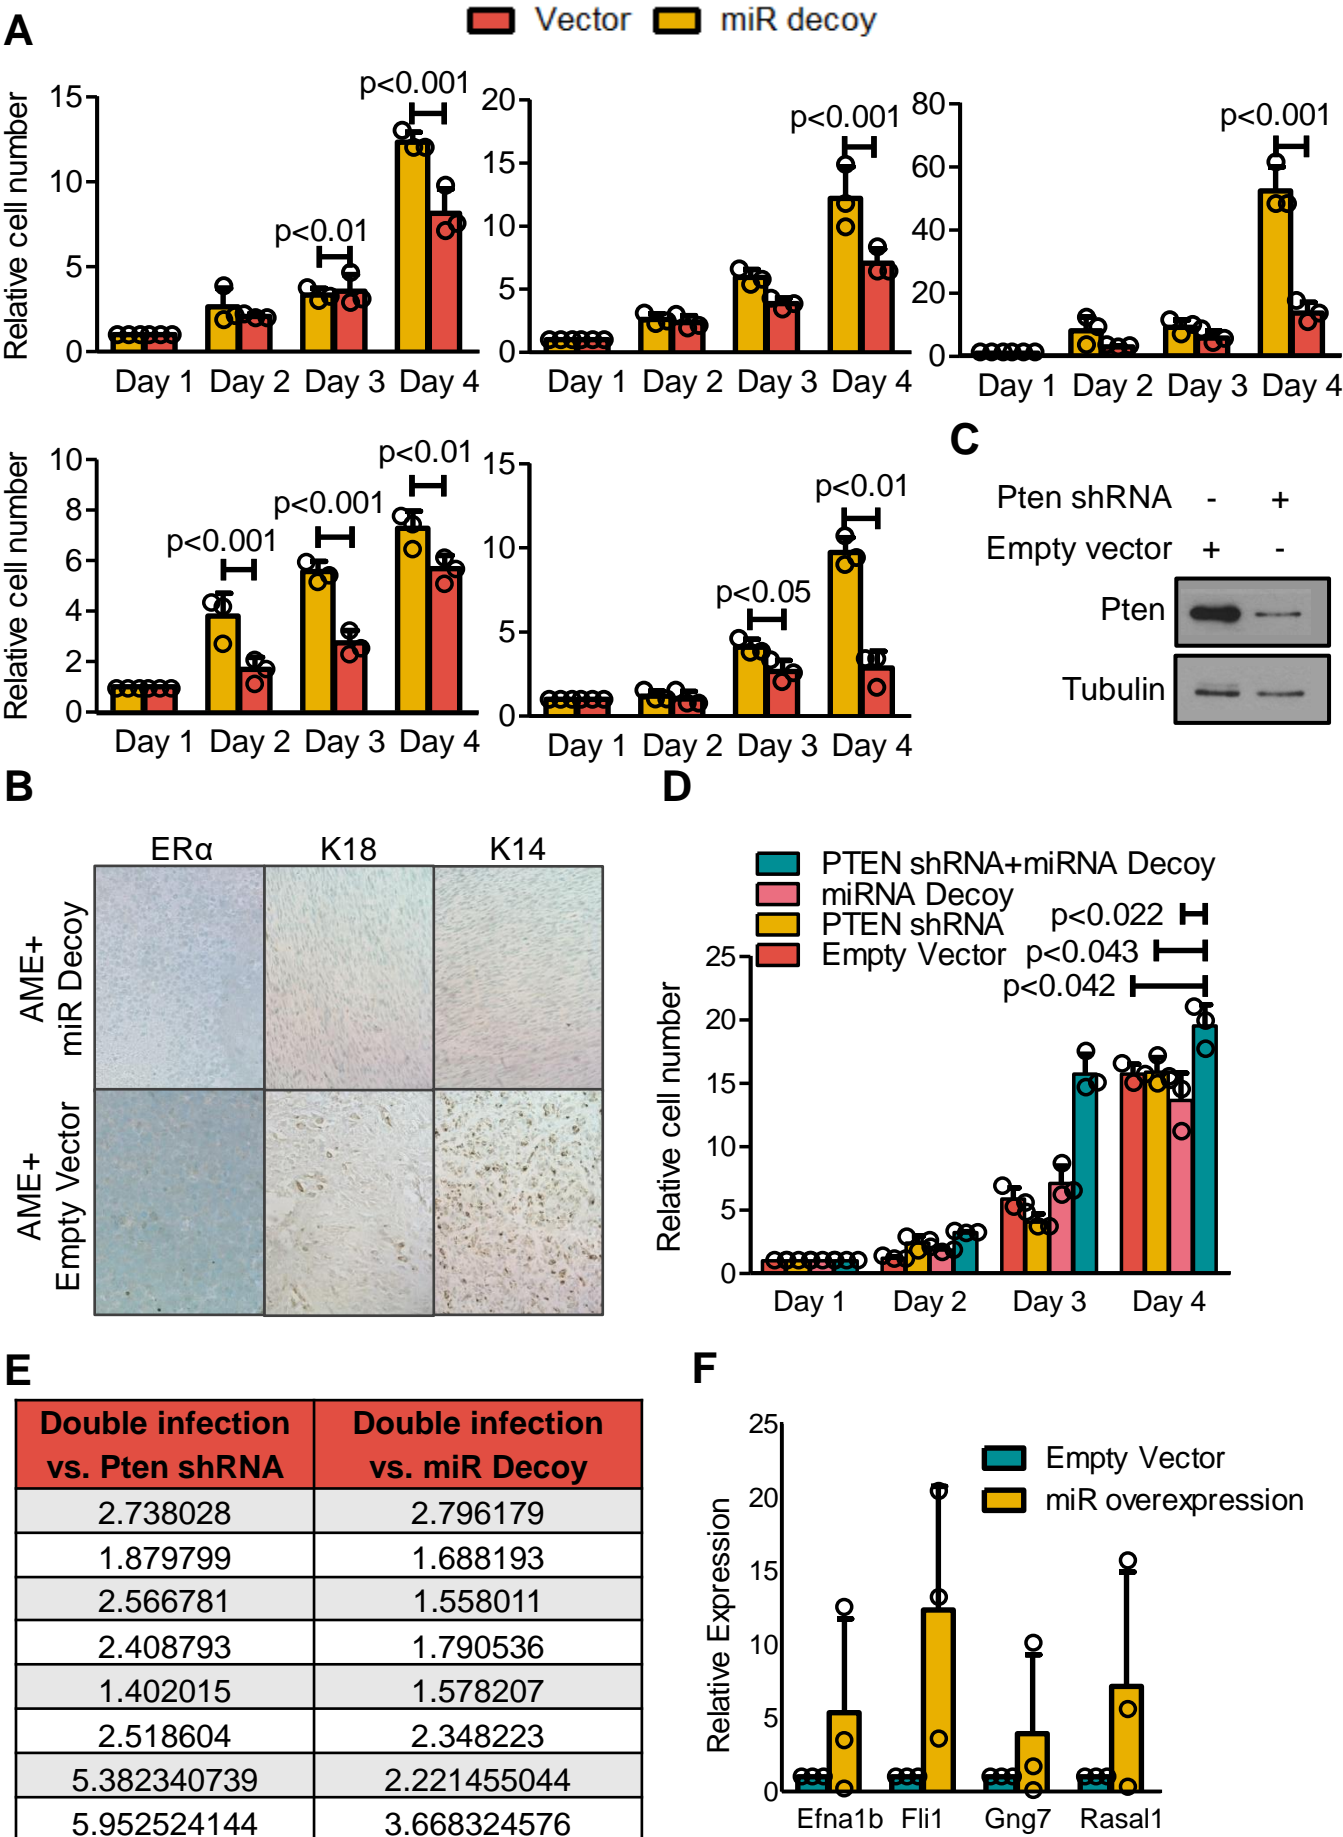

**Figure S9**

| Pathway          | AMEs     | PDAs     | p value  |
|------------------|----------|----------|----------|
| AKT              | 0.48041  | 0.386916 | 0.120221 |
| $\beta$ -catenin | 0.275591 | 0.577568 | 0.092178 |
| E2F1             | 0.297701 | 0.396888 | 0.255529 |
| EGFR             | 0.456918 | 0.396238 | 0.356287 |
| ER*              | 0.04189  | 0.775224 | 7.49E-05 |
| Her2             | 0.394228 | 0.448001 | 0.581988 |
| IFN $\alpha$ *   | 0.499751 | 0.279422 | 0.001646 |
| IFN gamma        | 0.317352 | 0.283905 | 0.547193 |
| Myc              | 0.28791  | 0.454292 | 0.177517 |
| p53              | 0.520215 | 0.505344 | 0.806167 |
| p63              | 0.692959 | 0.575521 | 0.379592 |
| PI3K             | 0.600866 | 0.61257  | 0.886442 |
| PR               | 0.273898 | 0.122126 | 0.081602 |
| Ras*             | 0.468508 | 0.713203 | 0.001794 |
| Src              | 0.663806 | 0.504662 | 0.266863 |
| STAT3            | 0.576253 | 0.519356 | 0.241694 |
| TGF $\beta$ *    | 0.331704 | 0.63198  | 0.005339 |
| TNF $\alpha$ *   | 0.309567 | 0.194076 | 0.001017 |
